# Supplementary material for: CURIE: Towards an Ontology and Enterprise Architecture of a CRM Conceptual Model
Source: Springer Nature journal article supplement (doi:10.1007/s12599-022-00744-0), 2022-02-21
Supplement: MOESM1 [file 20153536]

# **CURIE: Towards an Ontology and Enterprise Architecture of a CRM Conceptual Model**

**Miguel Fernández-Cejas, Carlos J. Pérez-González, José L. Roda-García, Marcos Colebrook**

Business & Information Systems Engineering (2022)

**Appendix (available online via <http://link.springer.com>)**

---

**Appendix A CURIE: Towards an Ontology and Enterprise Architecture of a CRM  
Conceptual Model (Supplementary material)**

Table 1: Common CRM concepts from 5 CRM comparison. Source: Cruz and Vasconcelos (2015)

| Sales                                                                                                                                                                                                                                                                                                                                                                                                                                                                               | Marketing                                                                                                                                                                                                                                            | Services                                                                                                                                                                                                                                                                                                                                                       | Reporting                                                                                                                                                                       | Integration                                                                                                                                                                                                                                                                                                                                         | Security                                                                                                                                                                                                                            | Other features                                                                                                                                                                           |
|-------------------------------------------------------------------------------------------------------------------------------------------------------------------------------------------------------------------------------------------------------------------------------------------------------------------------------------------------------------------------------------------------------------------------------------------------------------------------------------|------------------------------------------------------------------------------------------------------------------------------------------------------------------------------------------------------------------------------------------------------|----------------------------------------------------------------------------------------------------------------------------------------------------------------------------------------------------------------------------------------------------------------------------------------------------------------------------------------------------------------|---------------------------------------------------------------------------------------------------------------------------------------------------------------------------------|-----------------------------------------------------------------------------------------------------------------------------------------------------------------------------------------------------------------------------------------------------------------------------------------------------------------------------------------------------|-------------------------------------------------------------------------------------------------------------------------------------------------------------------------------------------------------------------------------------|------------------------------------------------------------------------------------------------------------------------------------------------------------------------------------------|
| <ul style="list-style-type: none"> <li>– Account management</li> <li>– Activity management</li> <li>– Competitor tracking</li> <li>– Contact management</li> <li>– Contract management</li> <li>– Lead management</li> <li>– Opportunity management</li> <li>– Product catalog and management</li> <li>– Quote management</li> <li>– Territory management</li> <li>– Quota management</li> <li>– Order management</li> <li>– Sales pipeline</li> <li>– Sales forecasting</li> </ul> | <ul style="list-style-type: none"> <li>– Campaign management</li> <li>– Campaign execution</li> <li>– Email marketing</li> <li>– Marketing campaigns</li> <li>– List management</li> <li>– Web lead to capture</li> <li>– Lead management</li> </ul> | <ul style="list-style-type: none"> <li>– Case escalation and notification</li> <li>– Case routing and queuing</li> <li>– Contact center</li> <li>– Case management</li> <li>– Customer self service portal</li> <li>– Email management</li> <li>– Knowledge base</li> <li>– Customer view</li> <li>– Service analytics</li> <li>– Service contracts</li> </ul> | <ul style="list-style-type: none"> <li>– Custom reports</li> <li>– Dashboards</li> <li>– Sales analytics</li> <li>– Marketing analytics</li> <li>– Service analytics</li> </ul> | <ul style="list-style-type: none"> <li>– Social networks</li> <li>– Email integration</li> <li>– Web-services api</li> <li>– Soap integration</li> <li>– Microsoft office integration</li> <li>– Automatic call distributor</li> <li>– Computer telephony integration</li> <li>– Cloud connectors</li> <li>– Integrated third-party apps</li> </ul> | <ul style="list-style-type: none"> <li>– Role based security</li> <li>– Advanced password management</li> <li>– Control data access</li> <li>– User based security</li> <li>– Team based security</li> <li>– Audit trail</li> </ul> | <ul style="list-style-type: none"> <li>– Workflow and processes automation</li> <li>– Document management</li> <li>– Mobile and offline access</li> <li>– Calendar management</li> </ul> |

Table 2: Main CRM concepts from 40 CRM comparison. Source: Business-Software (2021)

| Marketing                                                                                                                                                                                                                                                                 | Sales                                                                                                                                                                                                                                                                                                                          | Services                                                                                                                                                    | Other features                                                                                                                                                                                                                                                                                                                                                                                                                                                                                                                                                                                                                                                                                                                             |
|---------------------------------------------------------------------------------------------------------------------------------------------------------------------------------------------------------------------------------------------------------------------------|--------------------------------------------------------------------------------------------------------------------------------------------------------------------------------------------------------------------------------------------------------------------------------------------------------------------------------|-------------------------------------------------------------------------------------------------------------------------------------------------------------|--------------------------------------------------------------------------------------------------------------------------------------------------------------------------------------------------------------------------------------------------------------------------------------------------------------------------------------------------------------------------------------------------------------------------------------------------------------------------------------------------------------------------------------------------------------------------------------------------------------------------------------------------------------------------------------------------------------------------------------------|
| <ul style="list-style-type: none"> <li>- Lead generation</li> <li>- Lead nurturing</li> <li>- Lead scoring</li> <li>- List Segmentation</li> <li>- Campaign management</li> <li>- Community building</li> <li>- Marketing resource</li> <li>- Brand management</li> </ul> | <ul style="list-style-type: none"> <li>- Service catalog</li> <li>- Opportunities management</li> <li>- Competitor tracking</li> <li>- Quotes management</li> <li>- Orders management</li> <li>- Contract management</li> <li>- Invoices management</li> <li>- Billing management</li> <li>- Commissions management</li> </ul> | <ul style="list-style-type: none"> <li>- Project management</li> <li>- Service contracts</li> <li>- Tickets management</li> <li>- Knowledge base</li> </ul> | <ul style="list-style-type: none"> <li>- Account management</li> <li>- Contact management</li> <li>- Customer lifecycle management</li> <li>- Contact center</li> <li>- Task management</li> <li>- Audit trail</li> <li>- Workflow management</li> <li>- Content management</li> <li>- Document management</li> <li>- Omnichannel support</li> <li>- Collaboration tools</li> <li>- Customer satisfaction management</li> <li>- Data Imports</li> <li>- Email management</li> <li>- Social media management</li> <li>- GDPR compliance</li> <li>- Mobile support</li> <li>- Analytics</li> <li>- Security</li> <li>- Integrations</li> <li>- Employee management</li> <li>- Organization management</li> <li>- Forms management</li> </ul> |

Table 3: Main CRM concepts from Gartner Magic Quadrant. Source: Gartner, Inc. (2021)

| CRM Lead Management                                                                                                                                                                                                                                                                                                                                    | Sales Force Automation                                                                                                                                                                                                                                                                                                                                                        | Multichannel Marketing Hubs                                                                                                                                                                                                                                                                                                           | Voice of the Customer                                                                                                                                                                                                                                             |
|--------------------------------------------------------------------------------------------------------------------------------------------------------------------------------------------------------------------------------------------------------------------------------------------------------------------------------------------------------|-------------------------------------------------------------------------------------------------------------------------------------------------------------------------------------------------------------------------------------------------------------------------------------------------------------------------------------------------------------------------------|---------------------------------------------------------------------------------------------------------------------------------------------------------------------------------------------------------------------------------------------------------------------------------------------------------------------------------------|-------------------------------------------------------------------------------------------------------------------------------------------------------------------------------------------------------------------------------------------------------------------|
| <ul style="list-style-type: none"> <li>– Multichannel lead management</li> <li>– Lead aggregation</li> <li>– Lead augmentation and deduplication</li> <li>– Lead process management</li> <li>– Lead nurturing</li> <li>– Lead scoring and qualification</li> <li>– Analytics and measurement</li> <li>– Integration with other applications</li> </ul> | <ul style="list-style-type: none"> <li>– Account and contact management</li> <li>– Activity management</li> <li>– Opportunity management</li> <li>– Guided selling</li> <li>– Forecasting management</li> <li>– Reports and dashboards</li> <li>– Mobile</li> <li>– Partner relationship management</li> <li>– Platform and integration</li> <li>– Lead management</li> </ul> | <ul style="list-style-type: none"> <li>– Customer profile management</li> <li>– Campaign workflow</li> <li>– Event triggering</li> <li>– Personalization</li> <li>– Marketing channel support</li> <li>– Real-time decisions/recommendations</li> <li>– Marketing analytics</li> <li>– Integration with other applications</li> </ul> | <ul style="list-style-type: none"> <li>– Customer feedback collection through multiple channels</li> <li>– Customer direct feedback</li> <li>– Customer indirect feedback</li> <li>– Customer inferred feedback</li> <li>– Customer actionable insight</li> </ul> |

---

## References

- Business-Software (2021) Top 40 customer relationship management software report: Comparison of the leading CRM software vendors. Available at <https://www.business-software.com/offer/top-40-crm-software/> (Accessed 27 Dec 2021)
- Cruz A, Vasconcelos A (2015) Towards a reference enterprise application architecture for the customer relationship management domain. In: Proceedings of the 17th international conference on enterprise information systems, SCITEPRESS – Science and Technology Publications, Lda., ICEIS 2015, vol 3, pp 185—195
- Gartner, Inc. (2021) Gartner magic quadrant and critical capabilities. Available at <https://www.gartner.com/en/research/magic-quadrant-critical-capabilities/> (Accessed 27 Dec 2021)
